# Supplementary material
Source: MDPI journal article supplement (https://www.mdpi.com/2073-4441/17/18/2661)
Supplement: s1 [file water-3791868-supplementary.pdf › water-3791868-supplementary.pdf]

---

## Electronic Supplementary Materials

### Text S1. Calculation of the distribution coefficient

The distribution coefficient (Kd) is a critical parameter governing the transport of solutes such as heavy metals in porous media. Here, Kd values for Fe, Cu, and Zn were calculated using the analytical solution of the one-dimensional convection–diffusion equation for instantaneous pulse input, as follows:

$$c(x,t) = \frac{M}{\sqrt{4\pi D_e(t_i - t_1)}} \exp\left(-\frac{(x - u_e(t_i - t_1))^2}{4D_e(t_i - t_1)}\right), \quad (\text{S1})$$

$$R = 1 + \frac{\rho_b}{\theta} K_d, \quad (\text{S2})$$

where  $c(x,t)$  is the solute concentration at position  $x$  and time  $t$ .  $M$  is the total mass released per unit cross-sectional area,  $D_e$  is the effective dispersion coefficient,  $u_e$  is the effective solute velocity,  $t_i$  and  $t_1$  are specific times, and  $R$  is the retardation factor.

### Text S2. SHAP analysis

A Kernel SHAP explainer was employed in this study, which approximates model behavior through sampling. This method is applicable to a wide range of machine learning models, including tree-based algorithms (e.g., Random Forest and XGBoost) as well as non-linear models such as SVM. Kernel SHAP was selected due to its model-agnostic nature, which does not depend on the internal structure of the model, thereby enabling consistent interpretation across heterogeneous model architectures. To ensure the explainer fully captured the model's learning behavior, the entire training dataset (103 samples) was used as the background dataset when constructing the SHAP explainer. In SHAP, the background dataset is used to simulate the model's response when features are missing, and its composition critically influences the stability and credibility of the explanations. Using all training samples as the background dataset enhances behavioral coverage and produces SHAP values that more accurately represent each feature's contribution to the model's decision-making process, thereby improving both interpretability and explanatory value.

**Table S1.** Optimal Model Hyperparameters and Hyperparameter Optimization Results

| Heavy metal | Input parameters | Optimal model | Model parameters                                                                                                                                                              | RMSE  | MAE   | R <sup>2</sup> | WI    |
|-------------|------------------|---------------|-------------------------------------------------------------------------------------------------------------------------------------------------------------------------------|-------|-------|----------------|-------|
| Fe          | GEO              | RF            | { n_estimators: 420, max_depth: 11, min_samples_split: 4, min_samples_leaf: 5, max_features: None, bootstrap: True }                                                          | 0.086 | 0.059 | 0.622          | 0.837 |
| Fe          | GEO              | XGBoost       | { n_estimators: 359, max_depth: 6, learning_rate: 0.020, subsample: 0.742, colsample_bytree: 0.650, min_child_weight: 9, gamma: 0.028, reg_alpha: 0.273, reg_lambda: 1.168 }  | 0.088 | 0.063 | 0.611          | 0.834 |
| Fe          | GEO              | SVM           | { kernel: poly, C: 8.405, gamma: scale, epsilon: 0.014, degree: 4 }                                                                                                           | 0.080 | 0.056 | 0.641          | 0.844 |
| Fe          | GEO & CH         | RF            | { n_estimators: 301, max_depth: 11, min_samples_split: 2, min_samples_leaf: 1, max_features: log2, bootstrap: False }                                                         | 0.070 | 0.054 | 0.729          | 0.873 |
| Fe          | GEO & CH         | XGBoost       | { n_estimators: 490, max_depth: 4, learning_rate: 0.145, subsample: 0.981, colsample_bytree: 0.764, min_child_weight: 10, gamma: 0.001, reg_alpha: 0.019, reg_lambda: 4.790 } | 0.051 | 0.066 | 0.710          | 0.880 |
| Fe          | GEO & CH         | SVM           | { kernel: rbf, C: 3.381, gamma: auto, epsilon: 0.013, degree: 5 }                                                                                                             | 0.080 | 0.061 | 0.595          | 0.842 |
| Fe          | GEO & CH & AWQ   | RF            | { n_estimators: 400, max_depth: 17, min_samples_split: 4, min_samples_leaf: 1, max_features: sqrt, bootstrap: False }                                                         | 0.061 | 0.045 | 0.796          | 0.896 |

---

|    |                   |         |                                                                                                                                                                                                   |       |       |       |       |
|----|-------------------|---------|---------------------------------------------------------------------------------------------------------------------------------------------------------------------------------------------------|-------|-------|-------|-------|
| Fe | GEO & CH<br>& AWQ | XGBoost | { n_estimators: 160,<br>max_depth: 6,<br>learning_rate: 0.020,<br>subsample: 0.903,<br>colsample_bytree: 0.769,<br>min_child_weight: 6,<br>gamma: 0.026, reg_alpha:<br>0.254, reg_lambda: 1.300 } | 0.048 | 0.062 | 0.805 | 0.899 |
| Fe | GEO & CH<br>& AWQ | SVM     | { kernel: rbf, C: 10.000,<br>gamma: auto, epsilon:<br>0.020, degree: 1 }                                                                                                                          | 0.064 | 0.048 | 0.707 | 0.879 |
| Zn | GEO               | RF      | { n_estimators: 150,<br>max_depth: 10,<br>min_samples_split: 8,<br>min_samples_leaf: 2,<br>max_features: log2,<br>bootstrap: True }                                                               | 0.095 | 0.143 | 0.848 | 0.913 |
| Zn | GEO               | XGBoost | { n_estimators: 170,<br>max_depth: 4,<br>learning_rate: 0.161,<br>subsample: 0.689,<br>colsample_bytree: 0.992,<br>min_child_weight: 7,<br>gamma: 0.006, reg_alpha:<br>0.022, reg_lambda: 3.639 } | 0.143 | 0.092 | 0.848 | 0.911 |
| Zn | GEO               | SVM     | { kernel: poly, C: 4.011,<br>gamma: scale, epsilon:<br>0.048, degree: 3 }                                                                                                                         | 0.159 | 0.107 | 0.831 | 0.900 |
| Zn | GEO & CH          | RF      | { n_estimators: 417,<br>max_depth: 8,<br>min_samples_split: 3,<br>min_samples_leaf: 2,<br>max_features: None,<br>bootstrap: True }                                                                | 0.140 | 0.092 | 0.863 | 0.921 |
| Zn | GEO & CH          | XGBoost | { n_estimators: 300,<br>max_depth: 6,<br>learning_rate: 0.298,<br>subsample: 0.795,<br>colsample_bytree: 0.964,<br>min_child_weight: 7,<br>gamma: 0.001, reg_alpha:<br>0.282, reg_lambda: 4.080 } | 0.079 | 0.109 | 0.928 | 0.950 |
| Zn | GEO & CH          | SVM     | { kernel: rbf, C: 4.876,<br>gamma: scale, epsilon:                                                                                                                                                | 0.129 | 0.095 | 0.903 | 0.940 |

|    |                   |         |                                                                                                                                                                                                      |       |       |       |       |
|----|-------------------|---------|------------------------------------------------------------------------------------------------------------------------------------------------------------------------------------------------------|-------|-------|-------|-------|
|    |                   |         | 0.010, degree: 4 }                                                                                                                                                                                   |       |       |       |       |
| Zn | GEO & CH<br>& AWQ | RF      | { n_estimators: 330,<br>max_depth: 14,<br>min_samples_split: 2,<br>min_samples_leaf: 5,<br>max_features: None, boot-<br>strap: False }                                                               | 0.062 | 0.099 | 0.896 | 0.936 |
| Zn | GEO & CH<br>& AWQ | XGBoost | { n_estimators: 55,<br>max_depth: 7, learn-<br>ing_rate: 0.238, subsample:<br>0.783, colsample_bytree:<br>0.897, min_child_weight:<br>9, gamma: 0.000,<br>reg_alpha: 0.479,<br>reg_lambda: 4.359 }   | 0.117 | 0.088 | 0.914 | 0.943 |
| Zn | GEO & CH<br>& AWQ | SVM     | { kernel: rbf, C: 2.824,<br>gamma: scale, epsilon:<br>0.022, degree: 5 }                                                                                                                             | 0.096 | 0.075 | 0.949 | 0.964 |
| Cu | GEO               | RF      | { n_estimators: 90,<br>max_depth: 14,<br>min_samples_split: 9,<br>min_samples_leaf: 1,<br>max_features: log2, boot-<br>strap: True }                                                                 | 0.309 | 0.191 | 0.689 | 0.858 |
| Cu | GEO               | XGBoost | { n_estimators: 330,<br>max_depth: 10, learn-<br>ing_rate: 0.151, subsample:<br>0.637, colsample_bytree:<br>0.612, min_child_weight:<br>2, gamma: 0.001,<br>reg_alpha: 0.230,<br>reg_lambda: 3.990 } | 0.189 | 0.308 | 0.692 | 0.860 |
| Cu | GEO               | SVM     | { kernel: poly, C: 8.240,<br>gamma: scale, epsilon:<br>0.021, degree: 5 }                                                                                                                            | 0.311 | 0.184 | 0.716 | 0.865 |
| Cu | GEO & CH          | RF      | { n_estimators: 263,<br>max_depth: 12,<br>min_samples_split: 8,<br>min_samples_leaf: 2,<br>max_features: None, boot-<br>strap: False }                                                               | 0.308 | 0.197 | 0.702 | 0.867 |

---

|    |                |         |                                                                                                                                                                                 |       |       |       |       |
|----|----------------|---------|---------------------------------------------------------------------------------------------------------------------------------------------------------------------------------|-------|-------|-------|-------|
| Cu | GEO & CH       | XGBoost | { n_estimators: 220,<br>max_depth: 4, learning_rate: 0.025, subsample: 0.669, colsample_bytree: 0.660, min_child_weight: 4, gamma: 0.000, reg_alpha: 0.348, reg_lambda: 4.630 } | 0.207 | 0.336 | 0.659 | 0.854 |
| Cu | GEO & CH       | SVM     | { kernel: linear, C: 2.806, gamma: auto, epsilon: 0.032, degree: 4 }                                                                                                            | 0.368 | 0.259 | 0.572 | 0.836 |
| Cu | GEO & CH & AWQ | RF      | { n_estimators: 402, max_depth: 18, min_samples_split: 9, min_samples_leaf: 4, max_features: None, bootstrap: True }                                                            | 0.099 | 0.062 | 0.896 | 0.936 |
| Cu | GEO & CH & AWQ | XGBoost | { n_estimators: 195, max_depth: 4, learning_rate: 0.068, subsample: 0.691, colsample_bytree: 0.941, min_child_weight: 4, gamma: 0.027, reg_alpha: 0.015, reg_lambda: 8.631 }    | 0.263 | 0.176 | 0.773 | 0.891 |
| Cu | GEO & CH & AWQ | SVM     | { kernel: linear, C: 4.956, gamma: auto, epsilon: 0.037, degree: 5 }                                                                                                            | 0.282 | 0.189 | 0.734 | 0.878 |

---

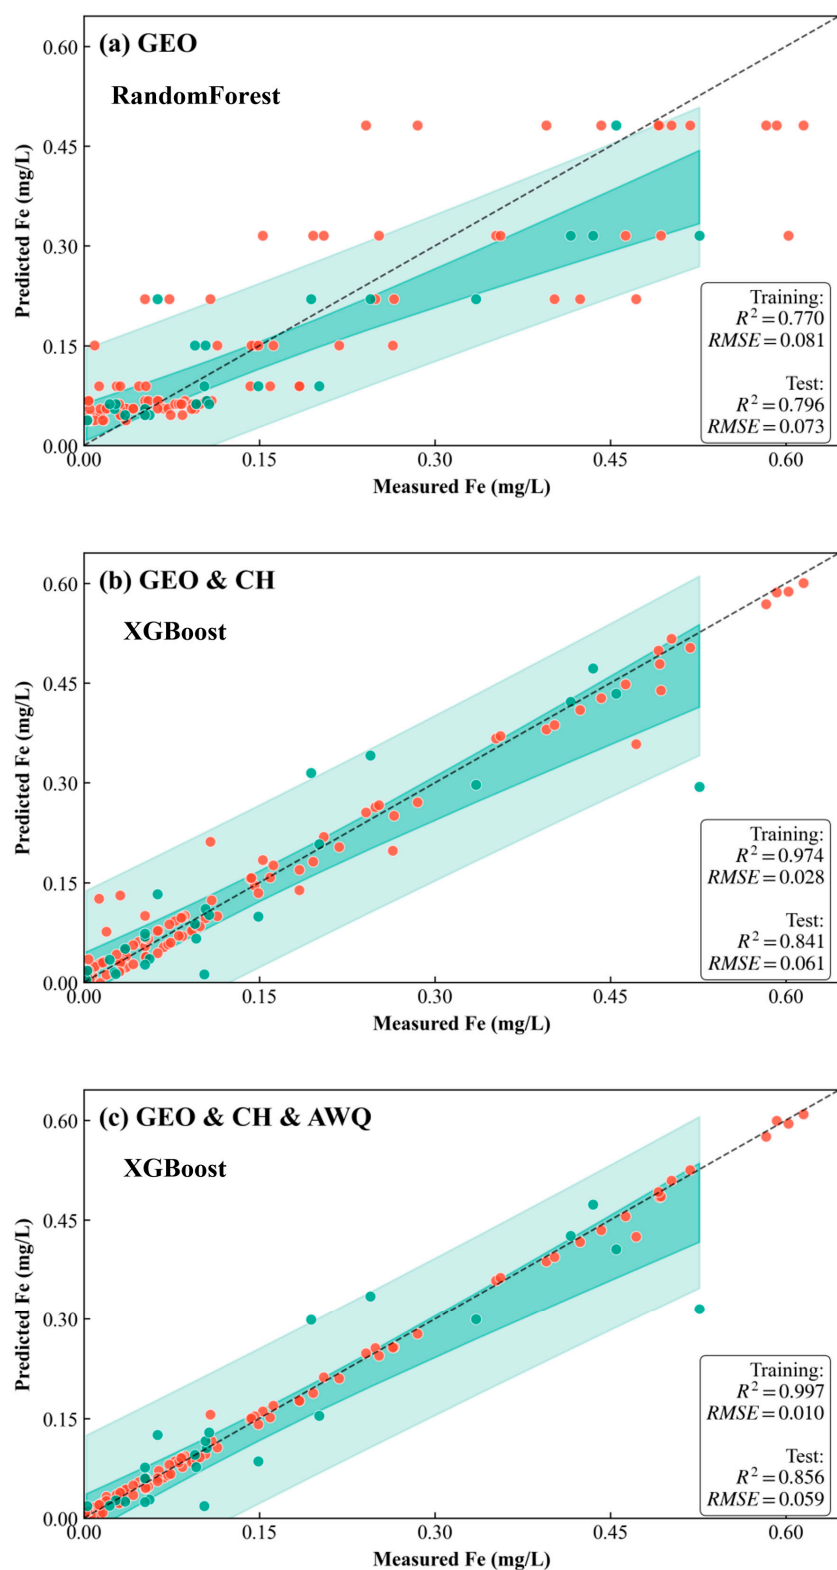

**Figure S1.** Predicted versus measured concentrations for Fe (a, b, c) with prediction models exhibiting the highest  $R^2$  values. Red points indicate training datasets, green points indicate test datasets, the black line is the 1:1 prediction line, light green shading shows the 95% prediction confidence interval, and dark green shading shows the 95% prediction confidence interval.

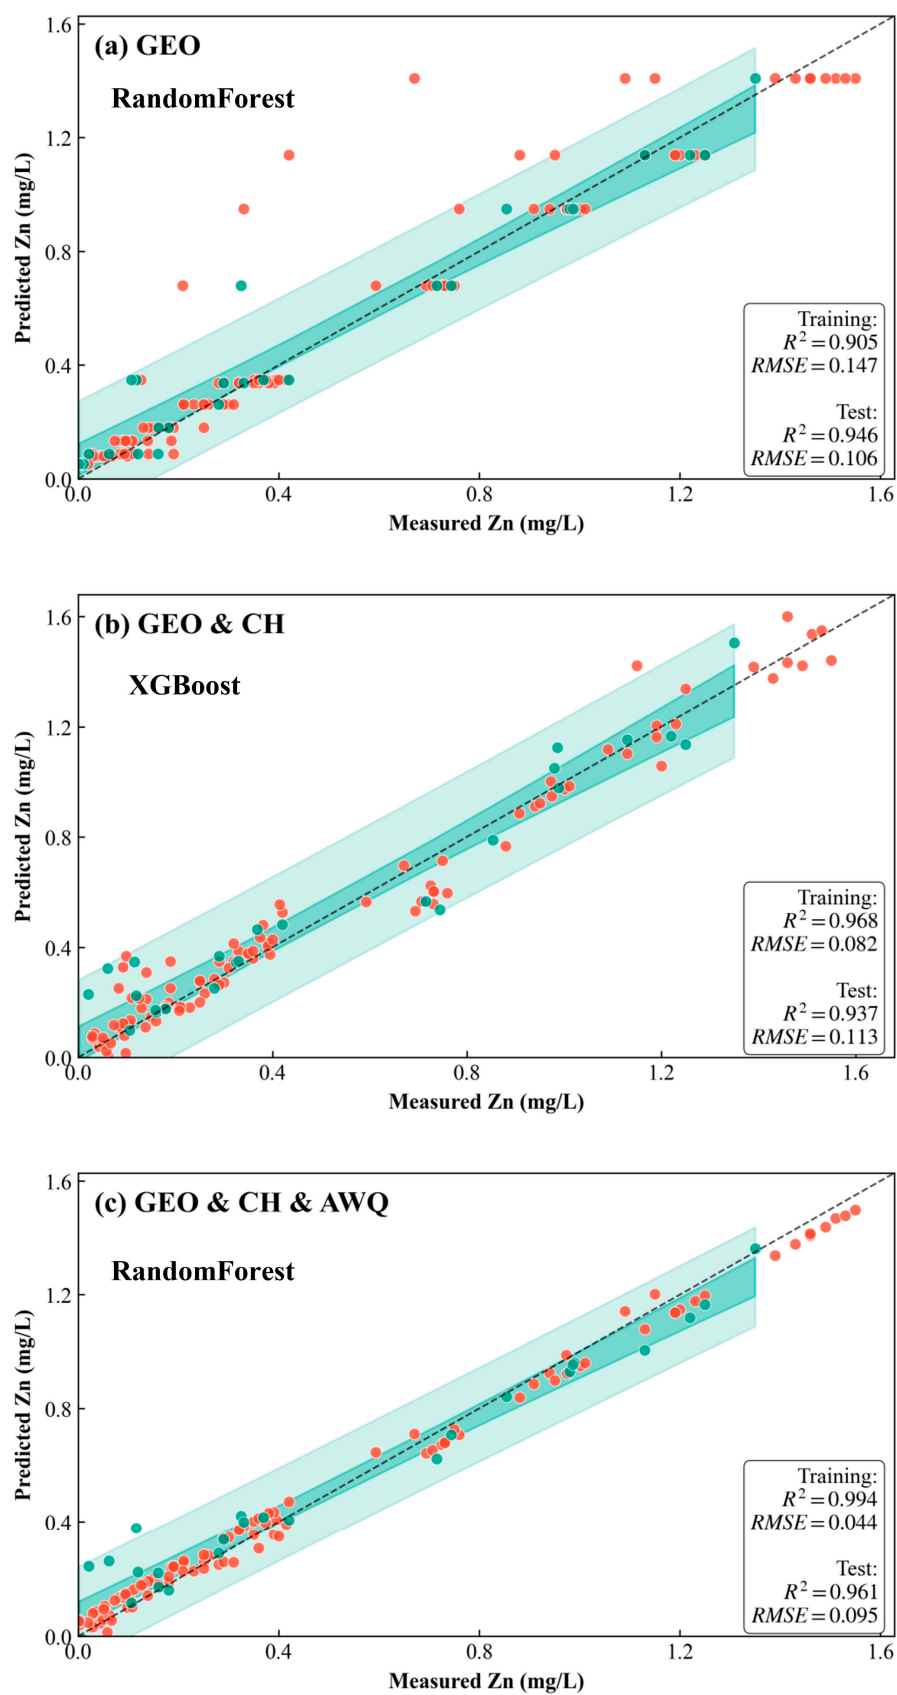

**Figure S2.** Predicted versus measured concentrations for Zn (a, b, c) with prediction models exhibiting the highest  $R^2$  values.

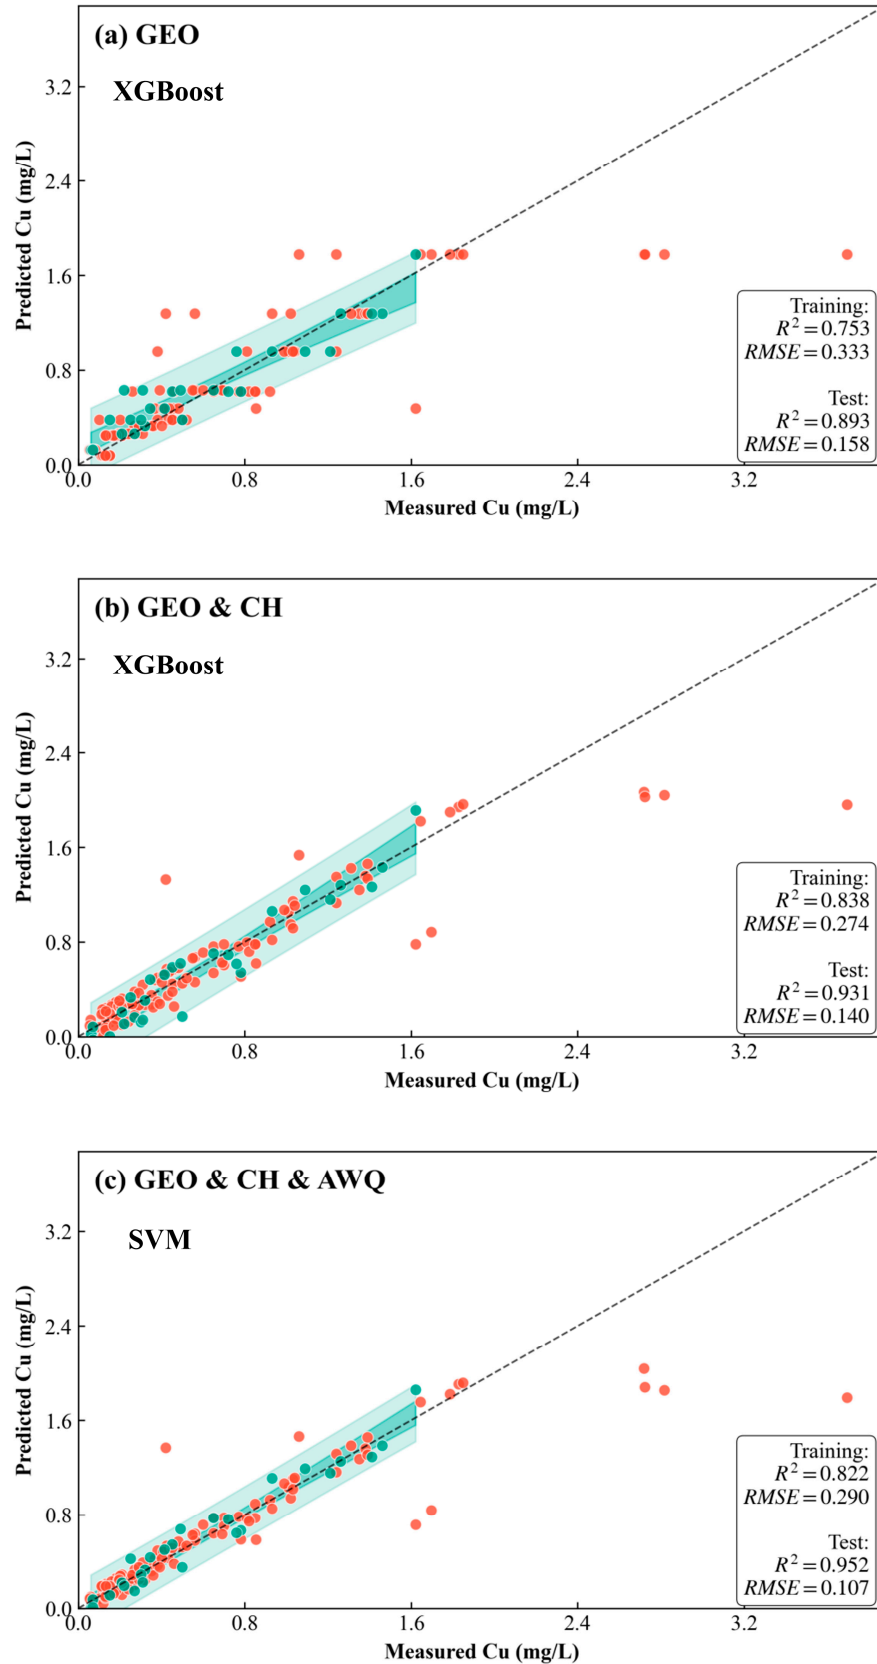

**Figure S3.** Predicted versus measured concentrations for Cu (a, b, c) with prediction models exhibiting the highest  $R^2$  values.



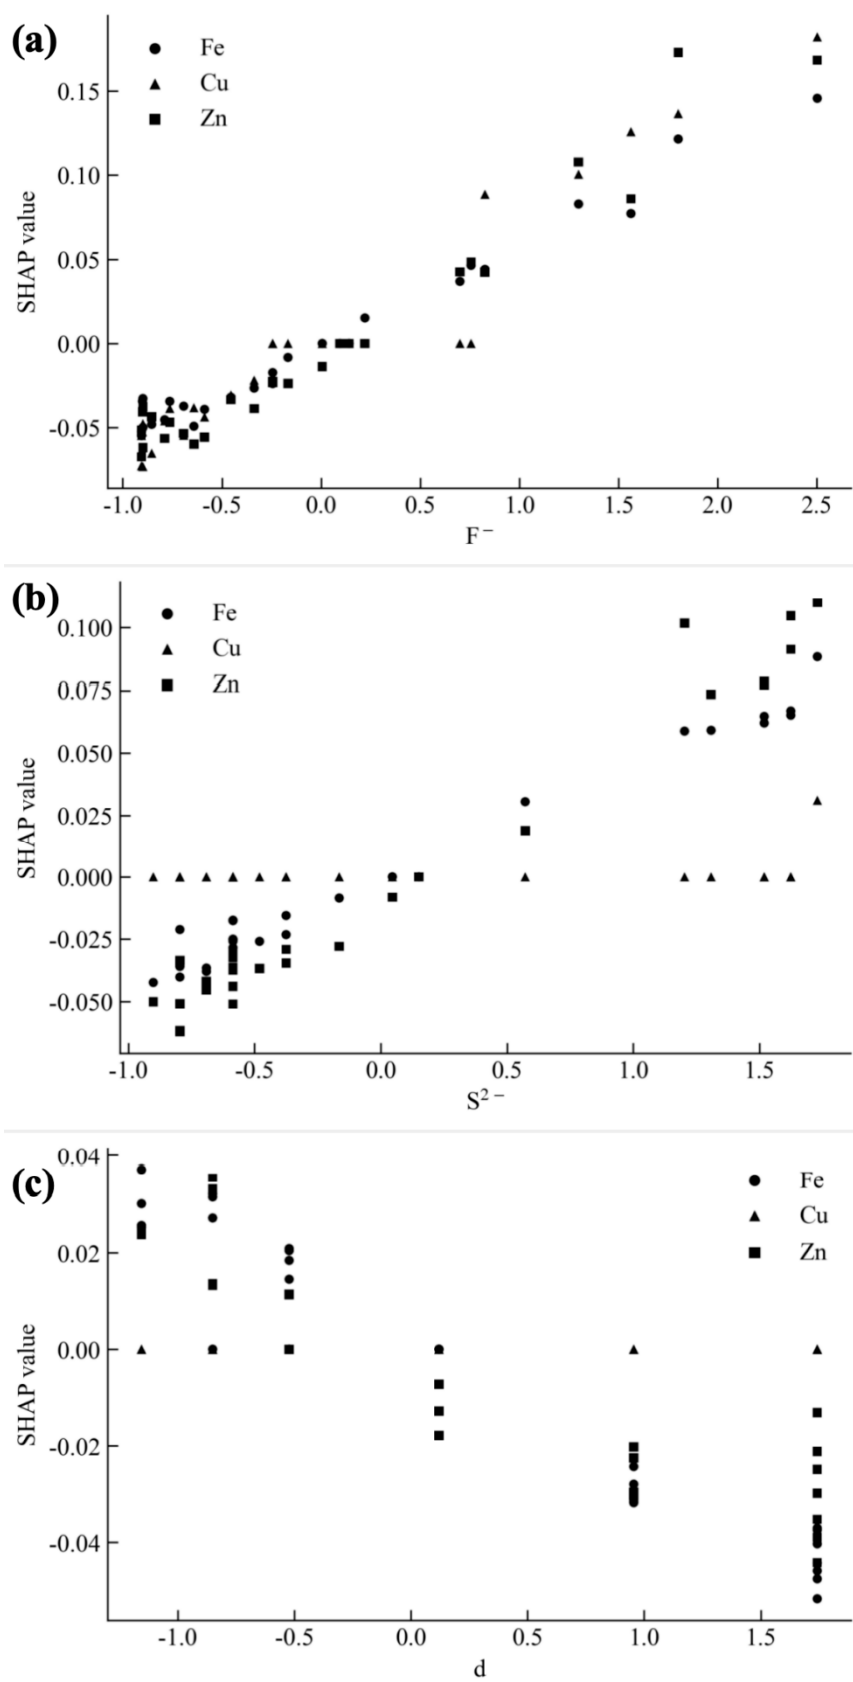

**Figure S4.** SHAP single analysis between (a)  $F^-$  and Fe, Cu, Zn; (b)  $S^{2-}$  and Fe, Cu, Zn; and (c) distance and Fe, Cu, Zn

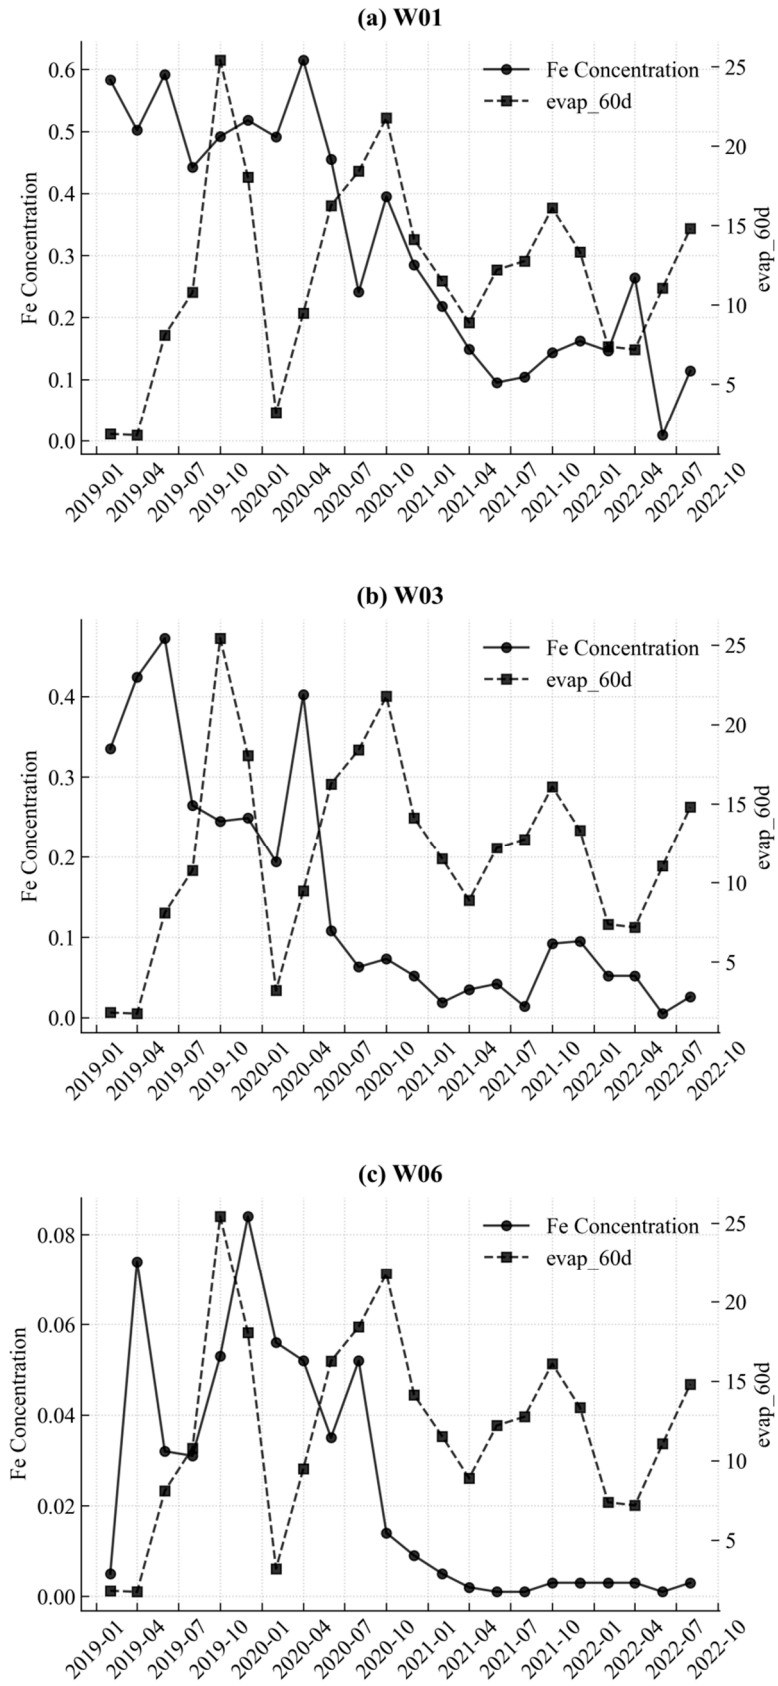

**Figure S5.** Temporal trends in Fe concentrations and cumulative evaporation over 60-day windows.

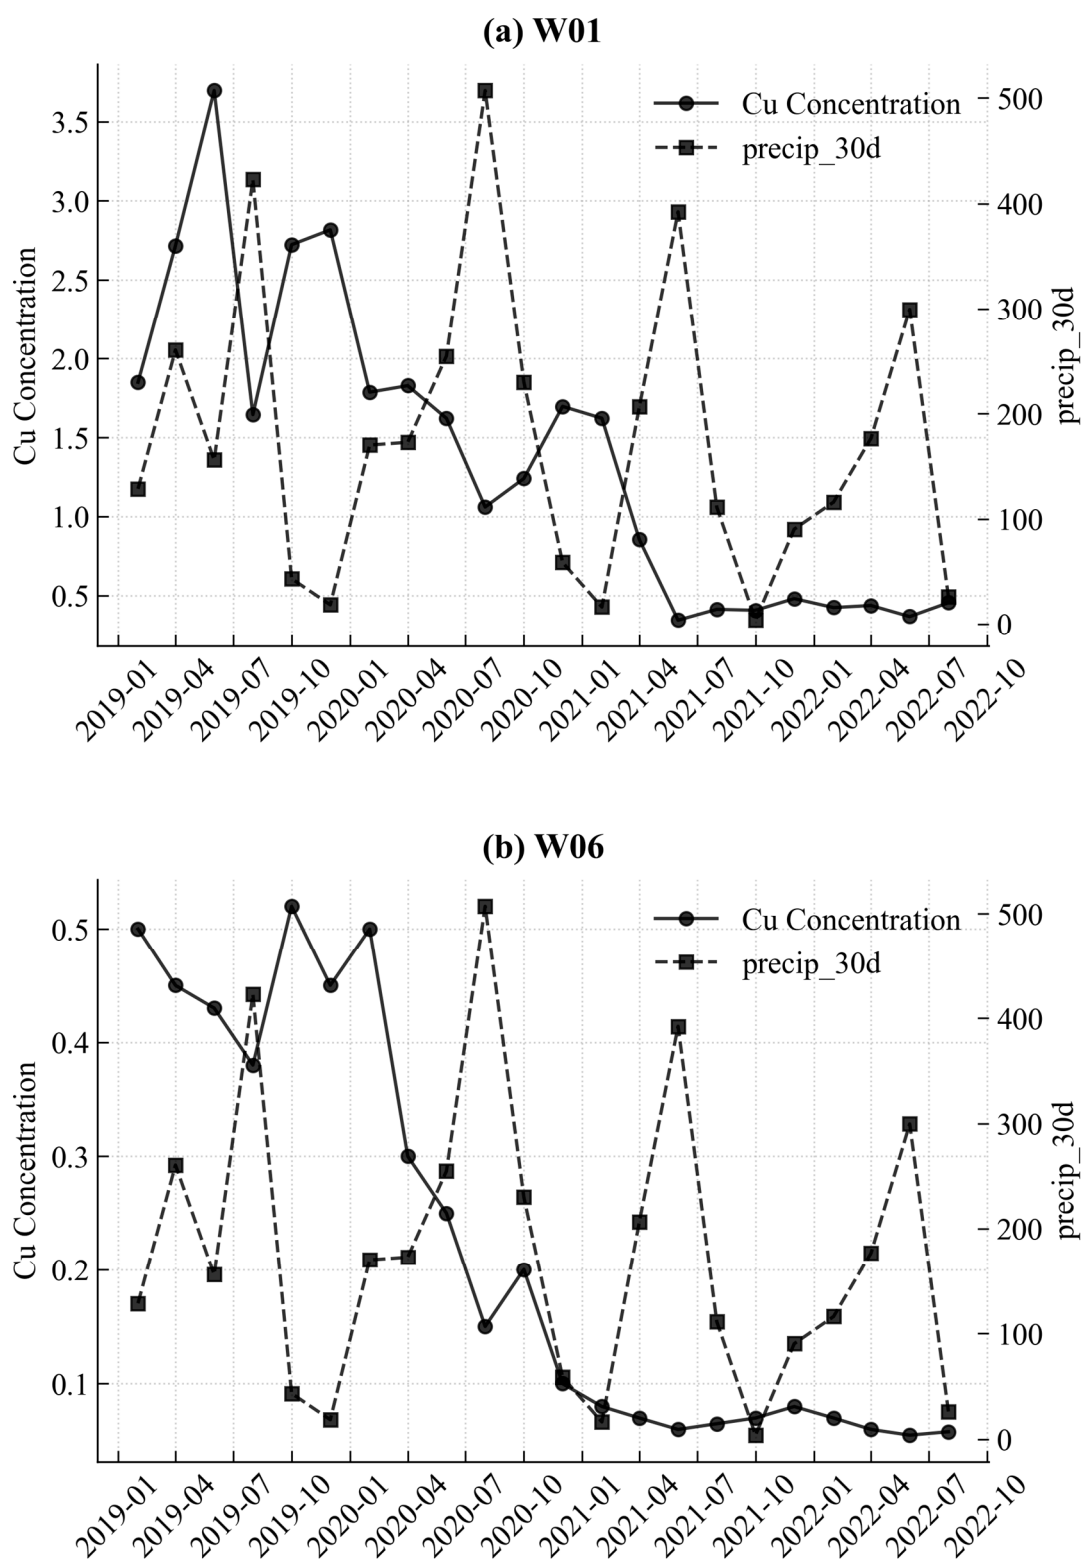

**Figure S6.** Temporal trends in Cu concentrations and cumulative precipitation over 30-day windows.

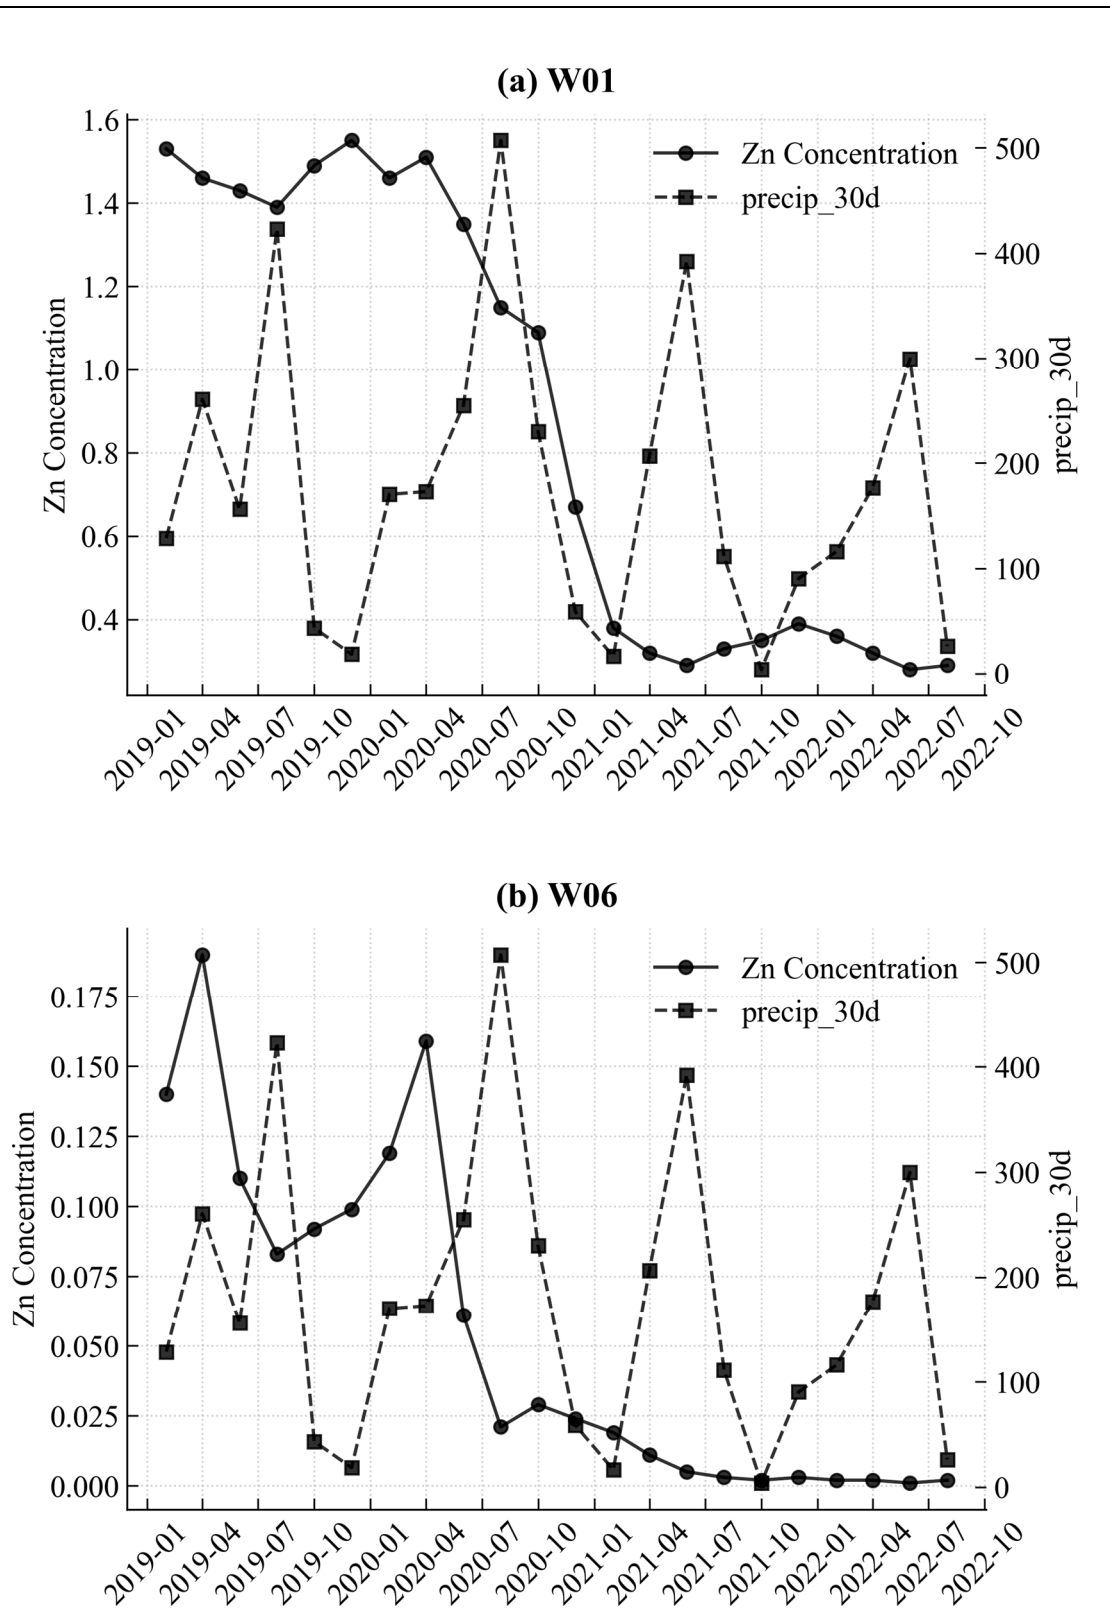

**Figure S7.** Temporal trends in Zn concentrations and cumulative precipitation over 30-day windows.

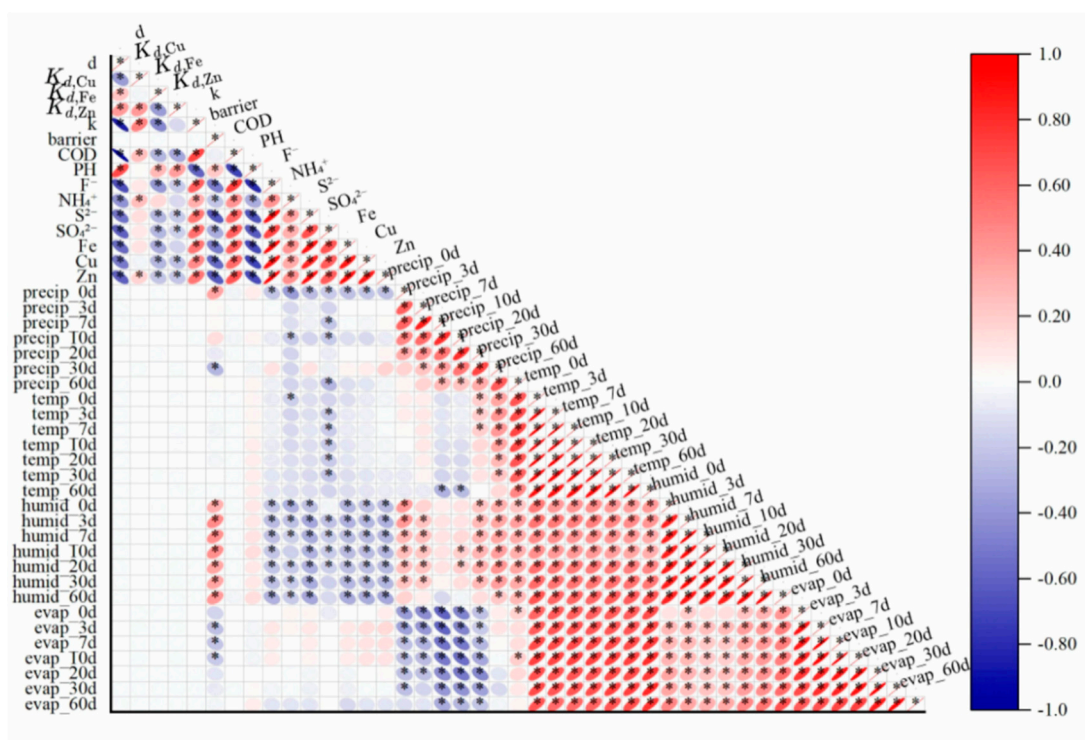

**Figure S8.** Pearson correlation coefficients for 37 parameters within the GEO, CH, AWQ datasets and the 3 target metal concentrations (\*: p value < 0.05).
